# Supplementary material for: Temperature for curing phthalonitrile-terminated poly(phthalazinone ether nitrile) reduced by a mixed curing agent and its curing behavior
Source: Royal Society of Chemistry journal article supplement (doi:10.1039/c5ra17234a), 2015-01-01
Supplement: c5ra17234a1.pdf [file c5ra17234a1.pdf]

*Electronic Supplementary Information for*

**Temperature for curing phthalonitrile-terminated poly(phthalazinone ether  
nitrile) reduced by a mixed curing agent and its curing behavior**

Zhihuan Weng<sup>a,b,c</sup>, Jiayi Fu<sup>b,c</sup>, Lishuai Zong<sup>b,c</sup>, Cheng Liu<sup>a,b,c</sup>, Jinyan Wang<sup>a,b,c\*</sup>, Xigao Jian<sup>a,b,c</sup>

a State Key Laboratory of Fine Chemicals, Dalian University of Technology, Dalian 116024,  
China

b Liaoning High Performance Resin Engineering Research Center, Dalian University of  
Technology, Dalian 116024, China

c Department of Polymer Science & Materials, Dalian University of Technology, Dalian 116024,  
China

\*Corresponding author: wangjinyan@dlut.edu.cn

**Fig. S1.**  $^1\text{H}$  NMR spectra (400 M,  $\text{CDCl}_3$ ,  $25\text{ }^\circ\text{C}$ ) of PPEN-Ph

**Fig. S2.** DSC curves of the curing reaction with BAS at different heating rates (1:  $5\text{ }^\circ\text{C}/\text{min}$ ; 2:  $10\text{ }^\circ\text{C}/\text{min}$ ; 3:  $15\text{ }^\circ\text{C}/\text{min}$ ; and 4:  $20\text{ }^\circ\text{C}/\text{min}$ )

**Fig. S3.** DSC curves of the curing reaction with  $\text{ZnCl}_2$  at different heating rates (1:  $5\text{ }^\circ\text{C}/\text{min}$ ; 2:  $10\text{ }^\circ\text{C}/\text{min}$ ; 3:  $15\text{ }^\circ\text{C}/\text{min}$ ; and 4:  $20\text{ }^\circ\text{C}/\text{min}$ )

**Fig. S4.** DSC curves of the curing reaction with AMTU at different heating rates (1:  $5\text{ }^\circ\text{C}/\text{min}$ ; 2:  $10\text{ }^\circ\text{C}/\text{min}$ ; 3:  $15\text{ }^\circ\text{C}/\text{min}$ ; and 4:  $20\text{ }^\circ\text{C}/\text{min}$ )

**Fig. S5.** Heating rate versus curing temperature of maximum peak line graph of BAS

**Fig. S6.** Heating rate versus curing temperature of maximum peak line graph of  $\text{ZnCl}_2$

**Fig. S7.** Heating rate versus curing temperature of maximum peak line graph of AMTU

**Table S1.** The DSC curves with BAS at different heating rates

**Table S2.** The DSC curves with  $\text{ZnCl}_2$  at different heating rates

**Table S3.** The data of DSC curves with AMTU at different heating rates

**Calculate  $E_a$  via Kissinger and Ozawa equation**

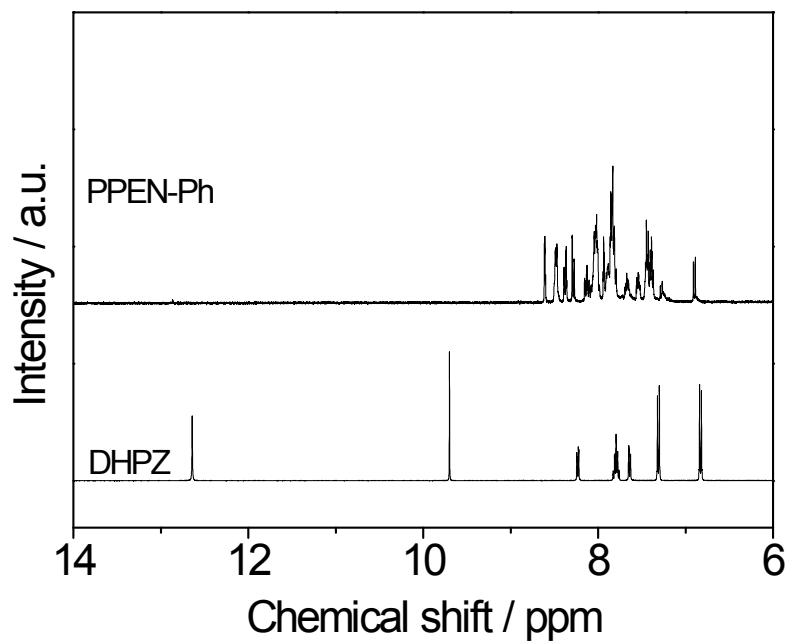

**Fig. S1.** <sup>1</sup>H NMR spectra (400 M, CDCl<sub>3</sub>, 25 °C) of PPEN-Ph.

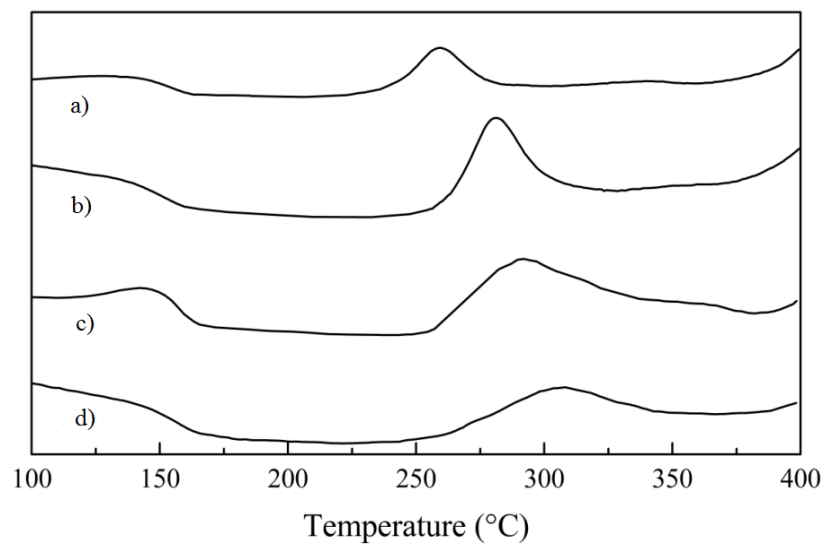

**Fig. S2.** DSC curves of the curing reaction with BAS at different heating rates. a): 5 °C·min<sup>-1</sup>; b): 10 °C·min<sup>-1</sup>; c): 15 °C·min<sup>-1</sup>; d): 20 °C·min<sup>-1</sup>.

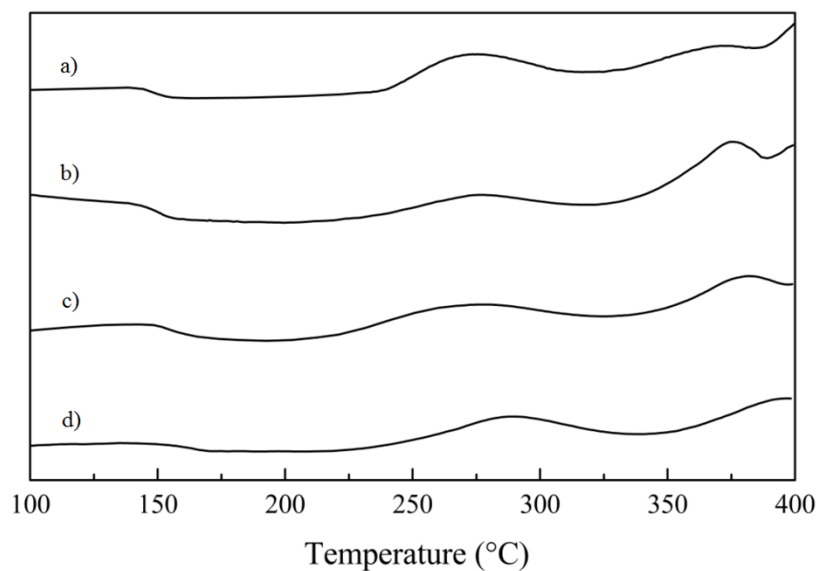

**Fig. S3.** DSC curves of the curing reaction with ZnCl<sub>2</sub> at different heating rates. a): 5 °C·min<sup>-1</sup>;  
b): 10 °C·min<sup>-1</sup>; c): 15 °C·min<sup>-1</sup>; d): 20 °C·min<sup>-1</sup>.

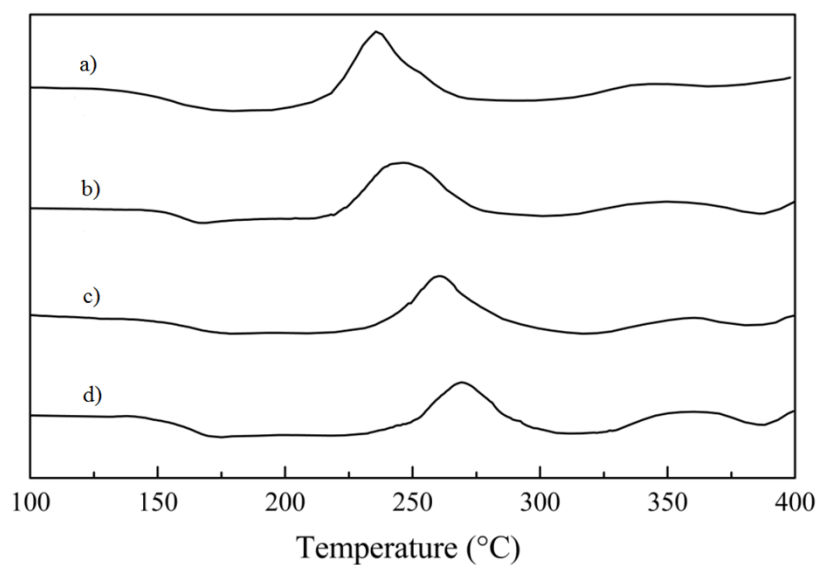

**Fig. S4.** DSC curves of the curing reaction with AMTU at different heating rates. a): 5 °C·min<sup>-1</sup>;  
b): 10 °C·min<sup>-1</sup>; c): 15 °C·min<sup>-1</sup>; d): 20 °C·min<sup>-1</sup>.

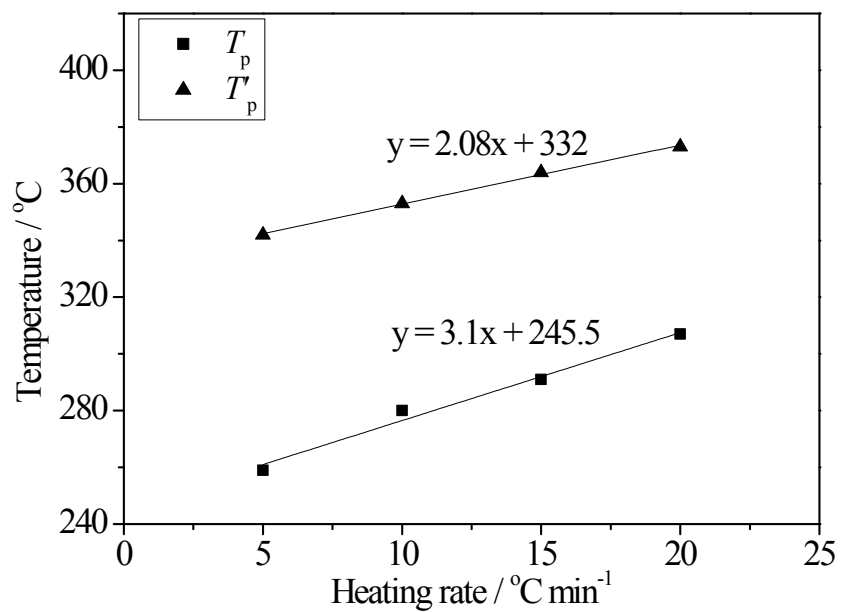

Fig. S5. Heating rate versus curing temperature of maximum peak over BAS.

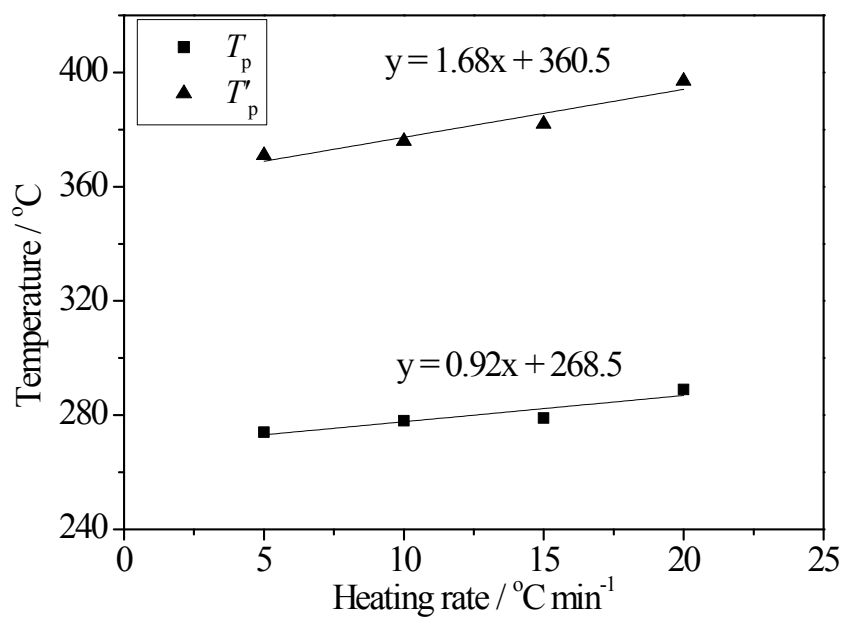

Fig. S6. Heating rate versus curing temperature of maximum peak over  $\text{ZnCl}_2$ .

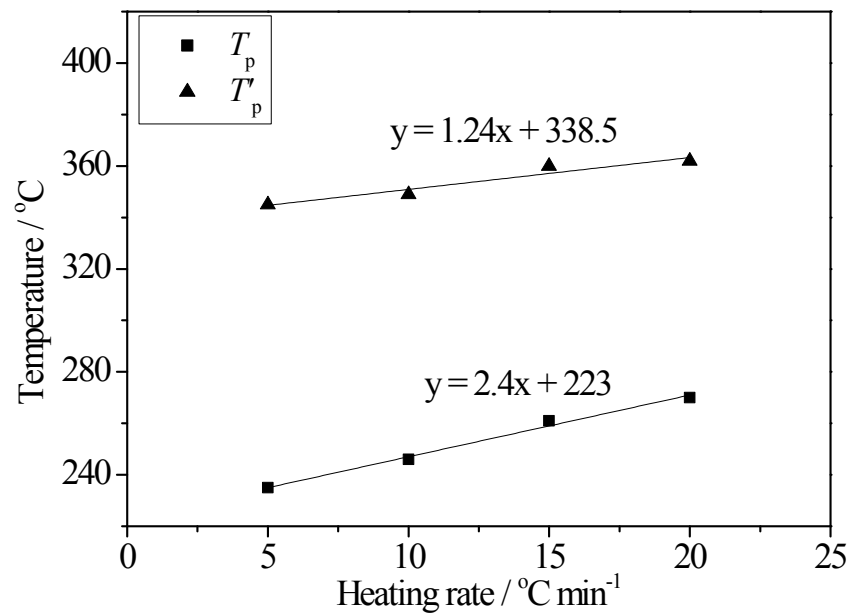

**Fig. S7.** Heating rate versus curing temperature of maximum peak over AMTU.

**Table S1** The DSC curves with BAS at different heating rates

| Heating rate / °C·min <sup>-1</sup> | $T_p$ / °C | $T'_p$ / °C |
|-------------------------------------|------------|-------------|
| 5                                   | 259        | 342         |
| 10                                  | 280        | 353         |
| 15                                  | 291        | 364         |
| 20                                  | 307        | 373         |

**Table S2** The DSC curves with ZnCl<sub>2</sub> at different heating rates

| Heating rate / °C·min <sup>-1</sup> | $T_p$ / °C | $T'_p$ / °C |
|-------------------------------------|------------|-------------|
| 5                                   | 274        | 371         |
| 10                                  | 278        | 376         |
| 15                                  | 279        | 382         |
| 20                                  | 289        | 397         |

**Table S3** The data of DSC curves with AMTU at different heating rates

| Heating rate / °C·min <sup>-1</sup> | $T_p$ / °C | $T'_p$ / °C |
|-------------------------------------|------------|-------------|
| 5                                   | 235        | 345         |
| 10                                  | 246        | 349         |
| 15                                  | 261        | 360         |
| 20                                  | 270        | 362         |

### Calculate $E_a$ via Kissinger and Ozawa equation

The apparent activation energy  $E_a$  of the curing reaction is an important parameter to measure the curing reactivity of a curing system. It reflects the difficulty level of the curing reaction. The larger the  $E_a$  is, the higher curing temperature is generally required. This makes the reaction rate more sensitive to temperature. Thus, the apparent activation energy has a very vital significance to the research of curing reaction.<sup>1</sup> The apparent activation energy of the curing reaction in resin systems could be calculated via the Kissinger equation<sup>2,3</sup> and the Ozawa equation.<sup>4</sup>

Kissinger equation:

$$\frac{d[\ln(\beta/T_p^2)]}{d(1/T_p)} = -\frac{E_a}{R}$$

where  $\beta$  is the heating rate, °C·min<sup>-1</sup>;  $T_p$  is the temperature of maximum peak, K;  $E_a$  is the apparent activation energy, kJ/mol; and  $R$  is the Gas constant, 8.314 J·K<sup>-1</sup>·mol<sup>-1</sup>.

Ozawa equation:

$$\frac{d[\ln \beta]}{d(1/T_p)} = -\frac{1.052 E_a}{R}$$

where  $\beta$  is the heating rate, °C·min<sup>-1</sup>;  $T_p$  is the temperature of maximum peak, K;  $E_a$  is the apparent activation energy, kJ·mol<sup>-1</sup>; and  $R$  is the Gas constant, 8.314 J·K<sup>-1</sup>·mol<sup>-1</sup>.

### References

- 1 Y. Fan, K. Sun and R. Wu, *Polym. Mater. Sci. & Eng.*, 2001, **17**, 60.
- 2 H. E. Kissinger, *Anal. Chem.*, 1957, **29**, 1702.
- 3 A. Catalani and M. G. Bonicelli, *Thermochim. Acta*, 2005, **438**, 126.



4 T. Ozawa, *Bull. Chem. Soc. Jpn*, 1965, **38**, 1881.
